# Supplementary material for: Long-term survival, growth, and reproduction of Acropora palmata sexual recruits outplanted onto Mexican Caribbean reefs
Source: PeerJ. 2023 Aug 1;11:e15813. doi: 10.7717/peerj.15813 (PMC10402697; doi:10.7717/peerj.15813)
Supplement: Supplemental Information 1 — Tthe different parameters we followed during the study. [file peerj-11-15813-s001.xlsx]

## Sheet: Spawning information_1
SPECIES	Acropora palmata
Cohort	2011, 2012 and 2022
NAFM = Nights After Full Moon
AS= After Sunset
	Spawning events
Year	2011	2012	2022
Spawning Month	August	September	August
NAFM	5	5	3
Reef Site	Bocana		Picudas
Type of colonies	Wild	Wild	Sexual reproduction
Colonies that spawned	10	4	4
Colonies with gamete collection	>2	4	2
Area of monitoring (m2)	100	100	100
Spawning time AS (h)	02:20:00	02:30:00	01:58:00

## Sheet: Survival ex-situ, in-situ, reef
SPECIES	Acropora palmata
Cohort	2011, 2012
Percent survival of the 2011 and 2012 cohorts that were maintained in ex-situ culture, in-situ culture and transplanted to the reef, data are expressed as a percentage in relation to the age of the corals and the site where they were found.
Ex-situ culture in aquariums, in-situ in marine nurseries, and transplanted to the Cuevones reef in Cancun, Quintana Roo. Mexico.
During the lab rearing phase, all substrates were sampled for the number of live recruits during each survey
	2011				2012
	Date	Age	UNAM	XCARET	Date	Age	UNAM	XCARET
Ex-situ	2011-09-24	1 mo	1155	-	2012-12-12	3 mo	-	393
	2012-02-15	6 mo	119	35	2013-06-12	9 mo	-	151
	2012-05-01	9 mo	12	12	2013-09-20	12 mo	-	112
	aug-12	12 mo	12	12	2013-11-01	14 mo	-	107
	2013-09-01	25 mo	12	12	2014-03-01	18 mo	-	46
In-situ	apr-14	2.6 y	12	12	apr-14	1.6 y	18	18
	aug-14	3 y	12	12	2014-09-01	2 y	18	18
	2015-02-01	3.5 y	12	12	2015-02-01	2.4 y	18	18
Reef	2015-02-01	3.5 y	8	12	2015-02-01	2.5 y	5	4
	aug-17	6 y	8	12	aug-17	5 y	5	4
	aug-20	9 y	8	12	aug-20	8 y	5	4

## Sheet: Growth ex-situ
SPECIES	Acropora palmata
Cohort	2012
Ex-situ culture in aquariums.
Diameter max per colony, area and polyps number
recruits were measured from photographs of all the availables substrates that were followed through time
ND= Not available
Age of colonies	Monitoring date	# substrate	# Recruits	Maximum diameter (mm)	area (mm2)	# Polyps	Cohort
3 MONTHS	2012-12-12	4	1	2.186	3.825	4	2012
	2012-12-12	5	1	1.942	2.797	4	2012
	2012-12-12	7	1	2.91	6.334	7	2012
	2012-12-12	9	1	1.833	2.679	5	2012
	2012-12-12	10	1	2.904	7.65	6	2012
	2012-12-12	15	2	2.183	3.909	4	2012
	2012-12-12	15	2	2.246	3.75	6	2012
	2012-12-12	18	1	2.277	4.835	2	2012
	2012-12-12	19	1	2.373	4.124	5	2012
	2012-12-12	20	1	2.151	3.958	7	2012
	2012-12-12	22	1	2.631	92.438	5	2012
	2012-12-12	23	2	3.51	9.506	7	2012
	2012-12-12	23	2	2.451	4.45	5	2012
	2012-12-12	24	1	2.583	5.723	5	2012
	2012-12-12	25	1	2.421	3.711	5	2012
	2012-12-12	26	1	1.964	2.799	5	2012
	2012-12-12	27	1	1.474	1.828	3	2012
	2012-12-12	28	1	2.86	6.807	5	2012
	2012-12-12	29	1	3.008	6.75	6	2012
	2012-12-12	30	1	1.793	2.516	3	2012
4 MONTHS	2013-01-18	3	1	4.8	18.514	11	2012
	2013-01-18	5	1	4.178	13.817	9	2012
	2013-01-18	6	1	4.193	14.055	9	2012
	2013-01-18	8	1	4.46	13.591	10	2012
	2013-01-18	10	1	5.925	24.343	13	2012
	2013-01-18	13	2	2.924	46.478	8	2012
	2013-01-18	13	2	3.668	59.305	8	2012
	2013-01-18	15	2	2.899	6.479	8	2012
	2013-01-18	18	1	3.562	91.525	8	2012
	2013-01-18	19	1	3.806	10.77	7	2012
	2013-01-18	20	1	6.345	13.159	14	2012
	2013-01-18	22	1	6.333	29.553	14	2012
	2013-01-18	23	2	4.059	14.676	13	2012
	2013-01-18	23	2	6.597	34.195	21	2012
	2013-01-18	25	1	6.272	31.82	14	2012
	2013-01-18	27	1	3.222	7.526	7	2012
	2013-01-18	28	1	7.43	47.03	16	2012
	2013-01-18	30	1	3.893	11.023	8	2012
	2013-01-18	31	1	3.609	8.144	8	2012
5 MONTHS	2013-02-27	22	1	8.76	58.722	23	2012
	2013-02-27	25	1	9.724	69.41	30	2012
	2013-02-27	27	1	6.26	31.42	13	2012
	2013-02-27	29	1	7.83	44.688	17	2012
	2013-02-27	39	1	6.341	30.272	14	2012
	2013-02-27	44	1	8.079	51.361	17	2012
	2013-02-27	47	1	8.004	48.784	24	2012
	2013-02-27	49	1	5.522	21.791	14	2012
	2013-02-27	51	1	5.581	25.555	17	2012
	2013-02-27	52	1	10.762	78.348	30	2012
	2013-02-27	53	1	9.241	67.111	25	2012
	2013-02-27	54	1	5.845	24.734	10	2012
	2013-02-27	55	1	9.307	69.423	29	2012
	2013-02-27	69	1	10.406	80.193	31	2012
	2013-02-27	70	2	8.255	53.362	26	2012
	2013-02-27	70	2	7.161	40.223	20	2012
	2013-02-27	89	2	6.792	36.628	20	2012
	2013-02-27	89	2	5.458	23.334	13	2012
	2013-02-27	126	1	6.341	30.141	13	2012
	2013-02-27	143	1	8.909	60.999	23	2012
	2013-02-27	149	1	5.289	22.679	15	2012
7 MONTHS	2013-04-18	3	2	9.502	63.417	28	2012
	2013-04-18	4	2	11.978	122.929	49	2012
	2013-04-18	5	1	10.614	83.089	32	2012
	2013-04-18	6	1	16.281	177.168	45	2012
	2013-04-18	8	1	12.229	105.161	38	2012
	2013-04-18	16	2	11.953	105.56	40	2012
	2013-04-18	17	1	16.836	195.977	64	2012
	2013-04-18	19	2	10.56	95.345	25	2012
	2013-04-18	25	2	15.126	164.777	41	2012
	2013-04-18	26	1	10.489	81.388	29	2012
	2013-04-18	30	1	11.164	98.131	35	2012
	2013-04-18	33	1	15.406	171.379	54	2012
	2013-04-18	34	1	11.025	76	26	2012
	2013-04-18	38	4	11.468	82.738	30	2012
	2013-04-18	39	1	10.402	80.893	30	2012
	2013-04-18	40	1	13.223	108.93	39	2012
	2013-04-18	41	1	12.709	117.966	41	2012
	2013-04-18	44	1	12.803	121.149	43	2012
	2013-04-18	49	1	14.639	137.908	35	2012
	2013-04-18	52	1	12.109	96.541	35	2012
	2013-04-18	53	1	8.767	56.602	25	2012
	2013-04-18	55	1	9.348	53.52	18	2012
	2013-04-18	58	1	12.94	118.449	37	2012
	2013-04-18	62	3	13.01	116.75	47	2012
	2013-04-18	65	3	14.228	129.894	38	2012
	2013-04-18	65	3	14.295	154.887	45	2012
9 MONTHS	2013-06-12	20	1	15.315	169.883	56	2012
	2013-06-12	21	1	20.201	ND	ND	2012
	2013-06-12	36	1	18.308	245.993	ND	2012
	2013-06-12	37	1	11.588	101.111	58	2012
	2013-06-12	45	1	17.567	219.587	66	2012
	2013-06-12	46	1	12.72	113.957	42	2012
	2013-06-12	51	3	ND	ND	59	2012
	2013-06-12	70	1	15.677	144.575	50	2012
	2013-06-12	71	1	16.281	237.988	ND	2012
1 YEAR	2013-09-20	12	1	11.314	82.847	32	2012
	2013-09-20	34	1	17.062	184.069	54	2012
	2013-09-20	37	1	14.842	157.837	60	2012
	2013-09-20	46	1	18.69	243.064	84	2012
	2013-09-20	70	1	18.974	224.267	71	2012

## Sheet: Growth in-situ
SPECIE	Acropora palmata
Cohort	2012
In-situ culture in marine nursery
Diameter max per colony
recruits were measured in scuba dive of all the availables colonies through time
ND= Not available
Cohort	Location	Monitoring date	ID colony	Dmax (cm)
2012	In situ	2015-02-27	AP1210	2.2
2012	In situ	2015-02-27	AP1203	4.6
2012	In situ	2015-02-27	AP1231	4.4
2012	In situ	2015-02-27	AP1264	4.2
2012	In situ	2015-02-27	AP1270	3.6
2012	In situ	2015-02-27	AP1277	4.6
2012	In situ	2015-02-27	AP1278	4.8
2012	In situ	2015-02-27	AP1289	4
2012	In situ	2015-02-27	AP1294	4.6
2012	In situ	2015-02-27	AP1295	2.3
2012	In situ	2015-02-27	AP1241	3.8
2012	In situ	2015-02-27	AP1293	2
2012	In situ	2015-02-27	AP1252	3.1
2012	In situ	2015-02-27	AP1276	3.8
2012	In situ	2015-02-27	AP1243	3.7
2012	In situ	2015-02-27	AP1290	3.5
2012	In situ	2015-02-27	AP1236	2.5
2012	In situ	2015-06-08	AP1210	2.5
2012	In situ	2015-06-08	AP1203	4.9
2012	In situ	2015-06-08	AP1231	6
2012	In situ	2015-06-08	AP1264	4.3688
2012	In situ	2015-06-08	AP1270	4.2926
2012	In situ	2015-06-08	AP1277	4.6228
2012	In situ	2015-06-08	AP1278	4.9022
2012	In situ	2015-06-08	AP1289	4.4196
2012	In situ	2015-06-08	AP1294	5.3594
2012	In situ	2015-06-08	AP1295	2.8
2012	In situ	2015-06-08	AP1241	3.8
2012	In situ	2015-06-08	AP1293	3.5
2012	In situ	2015-06-08	AP1252	3.5
2012	In situ	2015-06-08	AP1276	4.9
2012	In situ	2015-06-08	AP1243	4.4
2012	In situ	2015-06-08	AP1290	4.6
2012	In situ	2015-06-08	AP1236	2.9972
2012	In situ	2015-09-01	AP1210	3.2
2012	In situ	2015-09-01	AP1203	4.9
2012	In situ	2015-09-01	AP1231	6.8
2012	In situ	2015-09-01	AP1264	5.2
2012	In situ	2015-09-01	AP1270	5
2012	In situ	2015-09-01	AP1277	5.4
2012	In situ	2015-09-01	AP1278	5
2012	In situ	2015-09-01	AP1289	4.7
2012	In situ	2015-09-01	AP1294	5.3594
2012	In situ	2015-09-01	AP1295	3.1
2012	In situ	2015-09-01	AP1241	4.6
2012	In situ	2015-09-01	AP1293	3.6
2012	In situ	2015-09-01	AP1252	4.3
2012	In situ	2015-09-01	AP1276	5
2012	In situ	2015-09-01	AP1243	5.8
2012	In situ	2015-09-01	AP1290	5.2
2012	In situ	2015-09-01	AP1236	3.1
2012	In situ	2015-11-23	AP1210	2.9
2012	In situ	2015-11-23	AP1203	5.2
2012	In situ	2015-11-23	AP1231	7
2012	In situ	2015-11-23	AP1264	6.4
2012	In situ	2015-11-23	AP1270	5.9
2012	In situ	2015-11-23	AP1277	8
2012	In situ	2015-11-23	AP1278	5.8
2012	In situ	2015-11-23	AP1289	5.7
2012	In situ	2015-11-23	AP1294	6.2
2012	In situ	2015-11-23	AP1295	2.6
2012	In situ	2015-11-23	AP1241	4.7
2012	In situ	2015-11-23	AP1293	3.1
2012	In situ	2015-11-23	AP1252	4.7
2012	In situ	2015-11-23	AP1276	6
2012	In situ	2015-11-23	AP1243	4.6
2012	In situ	2015-11-23	AP1290	5.5
2012	In situ	2015-11-23	AP1236	3.2
2012	In situ	2016-03-28	AP1210	3.3
2012	In situ	2016-03-28	AP1203	5.2
2012	In situ	2016-03-28	AP1231	5
2012	In situ	2016-03-28	AP1264	6.4
2012	In situ	2016-03-28	AP1270	5.9
2012	In situ	2016-03-28	AP1277	9
2012	In situ	2016-03-28	AP1278	7.7
2012	In situ	2016-03-28	AP1289	7.4
2012	In situ	2016-03-28	AP1294	7.1
2012	In situ	2016-03-28	AP1295	2.8
2012	In situ	2016-03-28	AP1241	5.1
2012	In situ	2016-03-28	AP1293	3.5
2012	In situ	2016-03-28	AP1252	4.8
2012	In situ	2016-03-28	AP1276	6.6
2012	In situ	2016-03-28	AP1243	4.8
2012	In situ	2016-03-28	AP1290	6.2
2012	In situ	2016-03-28	AP1236	3.3
2012	In situ	2016-06-02	AP1210	ND
2012	In situ	2016-06-02	AP1203	9.047
2012	In situ	2016-06-02	AP1231	11.165
2012	In situ	2016-06-02	AP1264	8.22
2012	In situ	2016-06-02	AP1270	6.988
2012	In situ	2016-06-02	AP1277	15.203
2012	In situ	2016-06-02	AP1278	8.779
2012	In situ	2016-06-02	AP1289	9.625
2012	In situ	2016-06-02	AP1294	10.914
2012	In situ	2016-06-02	AP1295	4.575
2012	In situ	2016-06-02	AP1241	8.888
2012	In situ	2016-06-02	AP1293	4.418
2012	In situ	2016-06-02	AP1252	7.031
2012	In situ	2016-06-02	AP1276	7.77
2012	In situ	2016-06-02	AP1243	9.456
2012	In situ	2016-06-02	AP1290	9.518
2012	In situ	2016-06-02	AP1236	4.014

## Sheet: Growth Cuevones reef
SPECIES	Acropora palmata
Cohort	2011	2012
Colonies outplanted in Cuevones Reef, Cancún, Quintana Roo. México
Diameter max per colony
All colonies were measured in scuba dive.
Cohort	Initial nursery	Location	Monitoring date	ID colony	Dmax (cm)
2011	Xcaret	Cuevones Reef	2015-04-08	AP1126	16.5
2011	UNAM	Cuevones Reef	2015-04-08	AP1123	14.2
2011	UNAM	Cuevones Reef	2015-04-08	AP1128	14.5
2011	UNAM	Cuevones Reef	2015-04-08	AP1119	18.6
2011	UNAM	Cuevones Reef	2015-04-08	AP1117	14.5
2011	Xcaret	Cuevones Reef	2015-04-08	AP1108	9.1
2011	Xcaret	Cuevones Reef	2015-04-08	AP1111	11.8
2011	Xcaret	Cuevones Reef	2015-04-08	AP1191	6.1
2011	Xcaret	Cuevones Reef	2015-04-08	AP1120	12.9
2012	Xcaret	Cuevones Reef	2015-04-08	AP1207	4.2
2012	UNAM	Cuevones Reef	2015-04-08	AP1226	4.2
2012	Xcaret	Cuevones Reef	2015-04-08	AP1286	2.3
2012	Xcaret	Cuevones Reef	2015-04-08	AP1238	3.8
2012	Xcaret	Cuevones Reef	2015-04-08	AP1297	3.4
2012	UNAM	Cuevones Reef	2015-04-08	AP1206	5
2012	UNAM	Cuevones Reef	2015-04-08	AP1280	7.6
2012	UNAM	Cuevones Reef	2015-04-08	AP1221	6.9
2012	UNAM	Cuevones Reef	2015-04-08	AP1248	5.2
2012	UNAM	Cuevones Reef	2015-04-08	AP1265	5.3
2011	Xcaret	Cuevones Reef	2015-07-21	AP1126	16.5
2011	UNAM	Cuevones Reef	2015-07-21	AP1123	14.2
2011	UNAM	Cuevones Reef	2015-07-21	AP1128	14.5
2011	UNAM	Cuevones Reef	2015-07-21	AP1119	18.6
2011	UNAM	Cuevones Reef	2015-07-21	AP1117	14.5
2011	Xcaret	Cuevones Reef	2015-07-21	AP1108	11.3
2011	Xcaret	Cuevones Reef	2015-07-21	AP1111	14.2
2011	Xcaret	Cuevones Reef	2015-07-21	AP1191	8.3
2011	Xcaret	Cuevones Reef	2015-07-21	AP1120	13.7
2012	Xcaret	Cuevones Reef	2015-07-21	AP1207	5.7
2012	UNAM	Cuevones Reef	2015-07-21	AP1226	5
2012	Xcaret	Cuevones Reef	2015-07-21	AP1286	3.5
2012	Xcaret	Cuevones Reef	2015-07-21	AP1238	6.2
2012	Xcaret	Cuevones Reef	2015-07-21	AP1297	4.3
2012	UNAM	Cuevones Reef	2015-07-21	AP1206	6.2
2012	UNAM	Cuevones Reef	2015-07-21	AP1280	7.6
2012	UNAM	Cuevones Reef	2015-07-21	AP1221	6.9
2012	UNAM	Cuevones Reef	2015-07-21	AP1248	5.2
2012	UNAM	Cuevones Reef	2015-07-21	AP1265	5.3
2011	Xcaret	Cuevones Reef	2015-10-07	AP1126	17.025
2011	UNAM	Cuevones Reef	2015-10-07	AP1123	16.409
2011	UNAM	Cuevones Reef	2015-10-07	AP1128	14.3
2011	UNAM	Cuevones Reef	2015-10-07	AP1119	20.992
2011	UNAM	Cuevones Reef	2015-10-07	AP1117	17.028
2011	Xcaret	Cuevones Reef	2015-10-07	AP1108	11.934
2011	Xcaret	Cuevones Reef	2015-10-07	AP1111	15.08
2011	Xcaret	Cuevones Reef	2015-10-07	AP1191	10.47
2011	Xcaret	Cuevones Reef	2015-10-07	AP1120	12.094
2012	Xcaret	Cuevones Reef	2015-10-07	AP1207	10.94
2012	UNAM	Cuevones Reef	2015-10-07	AP1226	5
2012	Xcaret	Cuevones Reef	2015-10-07	AP1286	4.14
2012	Xcaret	Cuevones Reef	2015-10-07	AP1238	10.642
2012	Xcaret	Cuevones Reef	2015-10-07	AP1297	5.368
2012	UNAM	Cuevones Reef	2015-10-07	AP1206	9.783
2012	UNAM	Cuevones Reef	2015-10-07	AP1280	12.36
2012	UNAM	Cuevones Reef	2015-10-07	AP1221	12.679
2012	UNAM	Cuevones Reef	2015-10-07	AP1248	5.913
2012	UNAM	Cuevones Reef	2015-10-07	AP1265	7.65
2011	Xcaret	Cuevones Reef	2016-04-07	AP1126	20.5
2011	UNAM	Cuevones Reef	2016-04-07	AP1123	20.5
2011	UNAM	Cuevones Reef	2016-04-07	AP1128	19.6
2011	UNAM	Cuevones Reef	2016-04-07	AP1119	20.3
2011	UNAM	Cuevones Reef	2016-04-07	AP1117	26.5
2011	Xcaret	Cuevones Reef	2016-04-07	AP1108	10.1
2011	Xcaret	Cuevones Reef	2016-04-07	AP1111	18
2011	Xcaret	Cuevones Reef	2016-04-07	AP1191	12.5
2011	Xcaret	Cuevones Reef	2016-04-07	AP1120	17.3
2012	Xcaret	Cuevones Reef	2016-04-07	AP1207	14.3
2012	UNAM	Cuevones Reef	2016-04-07	AP1226	9
2012	Xcaret	Cuevones Reef	2016-04-07	AP1286	7
2012	Xcaret	Cuevones Reef	2016-04-07	AP1238	11.4
2012	Xcaret	Cuevones Reef	2016-04-07	AP1297	7.6
2012	UNAM	Cuevones Reef	2016-04-07	AP1206	11.3
2012	UNAM	Cuevones Reef	2016-04-07	AP1280	11.6
2012	UNAM	Cuevones Reef	2016-04-07	AP1221	17.5
2012	UNAM	Cuevones Reef	2016-04-07	AP1248	10.5
2012	UNAM	Cuevones Reef	2016-04-07	AP1265	9.7

## Sheet: Fertility samples_Cuevones Reef
SPECIES	Acropora palmata
Cohort	2011	2012
Samples were collected in August 2019 from transplanted colonies at Cuevones Reef, Cancun, Quintana Roo. Mexico.
In the laboratory samples were processed after fixation and decalcification.
After dissection of polyps, gonads and gametes were counted under the microscope.
Cohort	ID sample	# Polyp	# Oocytes	# Spermaries
2011	2	1	6	3
		2	6	3
		3	8	3
		4	6	3
		5	6	3
		6	6	2
		7	7	2
		8	5	2
		9	5	2
		10	5	2
		11	5	2
		12	10	2
		13	7	2
		14	7	3
2011	8	1	5	3
		2	4	3
		3	7	4
		4	3	5
		5	4	2
		6	6	3
		7	0	0
		8	0	0
		9	0	0
		10	0	0
		11	0	0
		12	0	0
		13	0	0
2011	10	1	2	3
		2	5	3
		3	4	3
		4	0	0
		5	0	0
		6	0	0
		7	0	0
		8	0	0
		9	0	0
		10	0	0
2011	20	1	7	4
		2	3	3
		3	6	6
		4	2	0
		5	2	1
		6	0	2
		7	5	4
		8	0	3
		9	4	4
		10	9	4
		11	6	4
		12	0	0
		13	0	0
2011	24	1	6	3
		2	5	2
		3	6	3
		4	6	3
		5	8	3
		6	9	4
		7	6	3
		8	6	3
		9	1	2
		10	1	3
		11	8	4
		12	6	2
		13	4	5
		14	6	5
2011	31	1	6	4
		2	3	3
		3	3	4
		4	5	3
		5	5	2
		6	4	3
		7	5	2
		8	0	0
		9	0	0
		10	0	0
2012	26	1	5	3
		2	4	2
		3	4	4
		4	5	2
		5	5	3
		6	5	3
		7	6	3
		8	5	3
		9	6	3
		10	4	3
		11	4	3
		12	4	0
2012	3	1	5	4
		2	4	2
		3	5	3
		4	8	5
		5	7	4
		6	7	3
		7	7	2
		8	5	2
		9	0	0
		10	0	0
		Total	387	221
		Mean	4.03125	2.30208
		SD	2.74323	1.5295
		Max	10	6
		Min	0	0

## Sheet: Survival  & Growth Picudas
SPECIES	Acropora palmata
Cohort	2011	2012
Colonies outplanted in Picudas Reef, Puerto Morelos, Quintana Roo. México
Survival= Number of colonies
All colonies were measured in scuba dive following AGRRA method for corals >5cm.
Age of colonies	Monitoring date	Substrate ID	# Colonies	Cohort	Length (cm)	Width (cm)	Height (cm)
9	September 2020	14	1	2011	29	20	21
9	September 2020	120	1	2011	14	12	20
8	September 2020	33	1	2012	22.5	21	20
8	September 2020	87	1	2012	24	14	20
8	September 2020	49	1	2012	28	22	30
8	September 2020	28/324	1	2012	7.5	6.5	9
8	September 2020	284/235	1	2012	21	17	13
8	September 2020	101/234	1	2012	9.3	8	8
8	September 2020	285/399/190	1	2012	23.5	14	17
8	September 2020	39/90	1	2012	12	9	13
8	September 2020	60/393/443	1	2012	37	20	27
8	September 2020	125	1	2012	17	13	19
8	September 2020	46/442	1	2012	45	21	40
8	September 2020	115/231	1	2012	41	30	42
8	September 2020	112	1	2012	44	38	35
8	September 2020	36/441	1	2012	47	22	44
9.2	October 2020	14	1	2011	30	25	26
9.2	October 2020	120	1	2011	12	12	23
8.1	October 2020	33	1	2012	22.5	21	21
8.1	October 2020	87	1	2012	13	11	23
8.1	October 2020	49	1	2012	26	22	28
8.1	October 2020	28/324	1	2012	9	6	10
8.1	October 2020	284/235	1	2012	21	17	13
8.1	October 2020	101/234	1	2012	9	6	9
8.1	October 2020	285/399/190	1	2012	23.5	14	17
8.1	October 2020	39/90	1	2012	12	9	13
8.1	October 2020	60/393/443	1	2012	39	21	23
8.1	October 2020	125	1	2012	17	13	19
8.1	October 2020	46/442	1	2012	32	17	30
8.1	October 2020	115/231	1	2012	31	28	34
8.1	October 2020	112	1	2012	42	22	33
8.1	October 2020	36/441	1	2012	21	17	35
10	September 2021	14	1	2011	28	36	33
10	September 2021	120	1	2011	17	17	27
9	September 2021	33	1	2012	25	18	25
9	September 2021	87	1	2012	18	15	27
9	September 2021	49	1	2012	30	25	28
9	September 2021	28/324	1	2012	20	25	35
9	September 2021	284/235	1	2012	10	5	5
9	September 2021	101/234	1	2012	15	10	10
9	September 2021	285/399/190	1	2012	21	16	15
9	September 2021	39/90	1	2012	15	10	13
9	September 2021	60/393/443	1	2012	47	27	30
9	September 2021	125	1	2012	18	10	20
9	September 2021	46/442	1	2012	37	20	35
9	September 2021	115/231	1	2012	6	4	2
9	September 2021	112	1	2012	45	30	35
9	September 2021	36/441	1	2012	30	18	38
9.3	November 2021	14	1	2011	35	25	30
9.3	November 2021	120	1	2011	20	15	25
8.2	November 2021	33	1	2012	20	15	35
8.2	November 2021	87	1	2012	15	15	20
8.2	November 2021	49	1	2012	30	25	30
8.2	November 2021	28/324	1	2012	25	25	35
8.2	November 2021	284/235	1	2012	10	8	5
8.2	November 2021	101/234	1	2012	20	15	20
8.2	November 2021	285/399/190	1	2012	25	15	20
8.2	November 2021	39/90	1	2012	15	15	10
8.2	November 2021	60/393/443	1	2012	50	30	40
8.2	November 2021	125	1	2012	15	10	25
8.2	November 2021	46/442	1	2012	35	15	40
8.2	November 2021	115/231	1	2012	4	3	2
8.2	November 2021	112	1	2012	40	35	35
8.2	November 2021	36/441	1	2012	30	15	45
10.5	February 2022	14	1	2011	40	30	20
10.5	February 2022	120	1	2011	20	20	30
9.4	February 2022	33	1	2012	30	15	30
9.4	February 2022	87	1	2012	20	18	20
9.4	February 2022	49	1	2012	35	30	30
9.4	February 2022	28/324	1	2012	20	10	15
9.4	February 2022	284/235	1	2012	10	10	5
9.4	February 2022	101/234	1	2012	20	15	20
9.4	February 2022	285/399/190	1	2012	25	20	20
9.4	February 2022	39/90	1	2012	20	15	15
9.4	February 2022	60/393/443	1	2012	50	25	30
9.4	February 2022	125	1	2012	15	15	25
9.4	February 2022	46/442	1	2012	35	20	50
9.4	February 2022	115/231	1	2012	10	5	5
9.4	February 2022	112	1	2012	45	40	45
9.4	February 2022	36/441	1	2012	35	20	50
11.2	October 2022	14	1	2011	40	33	26
11.2	October 2022	120	1	2011	25	20	30
10.1	October 2022	33	1	2012	25	23	25
10.1	October 2022	87	1	2012	28	25	30
10.1	October 2022	49	1	2012	42	35	33
10.1	October 2022	28/324	1	2012	22	17	15
10.1	October 2022	284/235	1	2012	18	13	10
10.1	October 2022	101/234	1	2012	25	25	20
10.1	October 2022	285/399/190	1	2012	30	23	18
10.1	October 2022	39/90	1	2012	25	20	15
10.1	October 2022	60/393/443	1	2012	55	35	30
10.1	October 2022	125	1	2012	16	18	23
10.1	October 2022	46/442	1	2012	40	30	48
10.1	October 2022	115/231	1	2012	15	10	10
10.1	October 2022	112	1	2012	48	43	35
10.1	October 2022	36/441	1	2012	40	35	45

## Sheet: Benthic cover-Picudas Reef
Benthic cover in Picudas Reef
Puerto Morelos,Quintana Roo
The monitoring were made following the AGRRA method, using 3 transects of 10 m length over a 10 x10 m of seeding area in Picidas reef.
First data was registered at the begining of the outplant os corals and two years after the outplant.
Every count means one of 100 registers of benthic cover a long the transect.
Date: OCTOBER-2020					Date: March-2022
# transect	CODE	#conteo	Cobertura		# transect	CODE	#conteo	Cobertura
1	DIC	1	1		1	CCA	1	1
1	DICT	2	1		1	TURF	2	1
1	TAS	3	1		1	TURF	3	1
1	TAS	4	1		1	TURF	4	1
1	CCA	5	1		1	TURF	5	1
1	DICT	6	1		1	CCA	6	1
1	CCA	7	1		1	CCA	7	1
1	CCA	8	1		1	DICT	8	1
1	DICT	9	1		1	DICT	9	1
1	DICT	10	1		1	CCA	10	1
1	CCA	11	1		1	DC	11	1
1	CCA	12	1		1	PEY	12	1
1	DICT	13	1		1	TURF	13	1
1	DICT	14	1		1	CCA	14	1
1	GORG	15	1		1	TURF	15	1
1	TAS	16	1		1	CCA	16	1
1	TAS	17	1		1	DICT	17	1
1	DICT	18	1		1	CCA	18	1
1	DICT	19	1		1	DICT	19	1
1	TAS	20	1		1	DICT	20	1
1	DICT	21	1		1	CCA	21	1
1	GORG	22	1		1	CCA	22	1
1	GORG	23	1		1	DICT	23	1
1	DICT	24	1		1	DICT	24	1
1	TAS	25	1		1	DICT	25	1
1	GORG	26	1		1	DICT	26	1
1	DICT	27	1		1	DICT	27	1
1	DICT	28	1		1	DICT	28	1
1	DICT	29	1		1	TURF	29	1
1	DICT	30	1		1	PEY	30	1
1	MCOM	31	1		1	DICT	31	1
1	TAS	32	1		1	DICT	32	1
1	TAS	33	1		1	DICT	33	1
1	TAS	34	1		1	TURF	34	1
1	DICT	35	1		1	DICT	35	1
1	DICT	36	1		1	TURF	36	1
1	DICT	37	1		1	TURF	37	1
1	TAS	38	1		1	TURF	38	1
1	TAS	39	1		1	CCA	39	1
1	TAS	40	1		1	CCA	40	1
1	CCA	41	1		1	TURF	41	1
1	DICT	42	1		1	TURF	42	1
1	GORG	43	1		1	TURF	43	1
1	DICT	44	1		1	CCA	44	1
1	GORG	45	1		1	TURF	45	1
1	GORG	46	1		1	CCA	46	1
1	GORG	47	1		1	CCA	47	1
1	DICT	48	1		1	CCA	48	1
1	DICT	49	1		1	CCA	49	1
1	TAS	50	1		1	HALI	50	1
1	TAS	51	1		1	TURF	51	1
1	PAST	52	1		1	HALI	52	1
1	PAST	53	1		1	TURF	53	1
1	CCA	54	1		1	CCA	54	1
1	CCA	55	1		1	PEY	55	1
1	CCA	56	1		1	CCA	56	1
1	CCA	57	1		1	TURF	57	1
1	MCOM	58	1		1	TURF	58	1
1	MCOM	59	1		1	TURF	59	1
1	MCOM	60	1		1	DICT	60	1
1	DICT	61	1		1	CCA	61	1
1	DICT	62	1		1	DICT	62	1
1	MCOM	63	1		1	PEY	63	1
1	MCOM	64	1		1	PEY	64	1
1	MCOM	65	1		1	DICT	65	1
1	MCOM	66	1		1	DICT	66	1
1	MCOM	67	1		1	DICT	67	1
1	DICT	68	1		1	HALI	68	1
1	DICT	69	1		1	HALI	69	1
1	CCA	70	1		1	HALI	70	1
1	CCA	71	1		1	HALI	71	1
1	CCA	72	1		1	PEY	72	1
1	CCA	73	1		1	HALI	73	1
1	CCA	74	1		1	TURF	74	1
1	CCA	75	1		1	TURF	75	1
1	CCA	76	1		1	TURF	76	1
1	CCA	77	1		1	TURF	77	1
1	CCA	78	1		1	TURF	78	1
1	CCA	79	1		1	CLIO	79	1
1	DICT	80	1		1	DICT	80	1
1	DICT	81	1		1	TURF	81	1
1	HALI	82	1		1	PEY	82	1
1	DICT	83	1		1	TURF	83	1
1	DICT	84	1		1	TURF	84	1
1	PAST	85	1		1	TURF	85	1
1	TAS	86	1		1	PEY	86	1
1	HALI	87	1		1	DICT	87	1
1	TAS	88	1		1	DICT	88	1
1	DICT	89	1		1	CCA	89	1
1	DICT	90	1		1	DICT	90	1
1	TAS	91	1		1	PAST	91	1
1	TAS	92	1		1	TURF	92	1
1	TAS	93	1		1	TURF	93	1
1	TAS	94	1		1	TURF	94	1
1	TAS	95	1		1	DICT	95	1
1	TAS	96	1		1	DICT	96	1
1	TAS	97	1		1	CCA	97	1
1	TAS	98	1		1	PEY	98	1
1	TAS	99	1		1	CCA	99	1
1	DICT	100	1		1	CCA	100	1
2	DICT	1	1		2	PEY	1	1
2	DICT	2	1		2	CCA	2	1
2	DICT	3	1		2	PAST	3	1
2	SPON	4	1		2	DICT	4	1
2	DICT	5	1		2	CCA	5	1
2	CCA	6	1		2	CCA	6	1
2	DICT	7	1		2	HALI	7	1
2	TAS	8	1		2	HALI	8	1
2	TAS	9	1		2	HALI	9	1
2	FMA	10	1		2	TURF	10	1
2	TAS	11	1		2	CCA	11	1
2	CCA	12	1		2	PAST	12	1
2	TAS	13	1		2	FAN	13	1
2	TAS	14	1		2	DICT	14	1
2	TAS	15	1		2	DICT	15	1
2	DICT	16	1		2	DICT	16	1
2	DICT	17	1		2	DICT	17	1
2	PAST	18	1		2	APAL	18	1
2	PAST	19	1		2	APAL	19	1
2	DICT	20	1		2	APAL	20	1
2	GORG	21	1		2	APAL	21	1
2	GORG	22	1		2	APAL	22	1
2	TAS	23	1		2	CCA	23	1
2	TAS	24	1		2	HALI	24	1
2	DICT	25	1		2	DICT	25	1
2	GORG	26	1		2	CCA	26	1
2	DICT	27	1		2	PEY	27	1
2	DICT	28	1		2	TURF	28	1
2	DICT	29	1		2	TURF	29	1
2	DICT	30	1		2	TURF	30	1
2	CCA	31	1		2	TURF	31	1
2	CCA	32	1		2	CCA	32	1
2	CCA	33	1		2	CCA	33	1
2	CCA	34	1		2	TURF	34	1
2	CCA	35	1		2	CCA	35	1
2	DICT	36	1		2	PEY	36	1
2	TAS	37	1		2	CCA	37	1
2	DICT	38	1		2	TURF	38	1
2	DICT	39	1		2	DICT	39	1
2	DICT	40	1		2	TURF	40	1
2	TAS	41	1		2	TURF	41	1
2	DICT	42	1		2	TURF	42	1
2	DICT	43	1		2	CCA	43	1
2	DICT	44	1		2	TURF	44	1
2	DICT	45	1		2	PEY	45	1
2	CCA	46	1		2	CCA	46	1
2	CCA	47	1		2	CCA	47	1
2	TAS	48	1		2	PEY	48	1
2	TAS	49	1		2	CCA	49	1
2	GORG	50	1		2	CCA	50	1
2	TAS	51	1		2	CCA	51	1
2	CCA	52	1		2	DICT	52	1
2	CCA	53	1		2	DICT	53	1
2	FMA	54	1		2	CCA	54	1
2	FMA	55	1		2	CCA	55	1
2	CCA	56	1		2	CCA	56	1
2	CCA	57	1		2	CCA	57	1
2	CCA	58	1		2	CCA	58	1
2	TAS	59	1		2	TURF	59	1
2	TAS	60	1		2	PEY	60	1
2	TAS	61	1		2	TURF	61	1
2	CCA	62	1		2	TURF	62	1
2	CCA	63	1		2	CCA	63	1
2	DICT	64	1		2	TURF	64	1
2	DICT	65	1		2	CCA	65	1
2	CCA	66	1		2	HALI	66	1
2	HALI	67	1		2	TURF	67	1
2	HALI	68	1		2	CCA	68	1
2	CCA	69	1		2	TURF	69	1
2	CCA	70	1		2	PEY	70	1
2	TAS	71	1		2	TURF	71	1
2	CMA	72	1		2	PEY	72	1
2	CCA	73	1		2	CCA	73	1
2	CCA	74	1		2	CCA	74	1
2	CCA	75	1		2	CCA	75	1
2	CCA	76	1		2	PEY	76	1
2	DICT	77	1		2	DICT	77	1
2	DICT	78	1		2	PEY	78	1
2	CCA	79	1		2	DICT	79	1
2	CCA	80	1		2	TURF	80	1
2	CCA	81	1		2	DICT	81	1
2	TAS	82	1		2	CCA	82	1
2	CMA	83	1		2	DICT	83	1
2	DICT	84	1		2	PAST	84	1
2	DICT	85	1		2	DICT	85	1
2	CCA	86	1		2	PAST	86	1
2	HALI	87	1		2	TURF	87	1
2	HALI	88	1		2	CCA	88	1
2	TAS	89	1		2	CCA	89	1
2	TAS	90	1		2	DICT	90	1
2	PAST	91	1		2	CCA	91	1
2	DICT	92	1		2	HALI	92	1
2	DICT	93	1		2	TURF	93	1
2	CCA	94	1		2	HALI	94	1
2	DICT	95	1		2	CCA	95	1
2	GORG	96	1		2	DICT	96	1
2	DICT	97	1		2	HALI	97	1
2	DICT	98	1		2	TURF	98	1
2	MCOM	99	1		2	CCA	99	1
2	MCOM	100	1		2	CCA	100	1
3	DICT	1	1		3	TURF	1	1
3	DICT	2	1		3	DICT	2	1
3	TAS	3	1		3	TURF	3	1
3	TAS	4	1		3	TURF	4	1
3	APAL	5	1		3	CCA	5	1
3	APAL	6	1		3	CCA	6	1
3	APAL	7	1		3	DICT	7	1
3	TAS	8	1		3	TURF	8	1
3	TAS	9	1		3	TURF	9	1
3	TAS	10	1		3	TURF	10	1
3	GORG	11	1		3	TURF	11	1
3	DICT	12	1		3	TURF	12	1
3	HALI	13	1		3	TURF	13	1
3	FMA	14	1		3	TURF	14	1
3	DICT	15	1		3	TURF	15	1
3	DICT	16	1		3	TURF	16	1
3	DICT	17	1		3	PEY	17	1
3	GORG	18	1		3	CCA	18	1
3	DICT	19	1		3	CCA	19	1
3	CCA	20	1		3	PEY	20	1
3	DICT	21	1		3	TURF	21	1
3	DICT	22	1		3	TURF	22	1
3	CCA	23	1		3	CCA	23	1
3	MCOM	24	1		3	CCA	24	1
3	MCOM	25	1		3	PEY	25	1
3	MCOM	26	1		3	DICT	26	1
3	MCOM	27	1		3	DICT	27	1
3	HALI	28	1		3	DICT	28	1
3	TAS	29	1		3	DICT	29	1
3	TAS	30	1		3	FAN	30	1
3	CCA	31	1		3	DICT	31	1
3	CCA	32	1		3	DICT	32	1
3	GORG	33	1		3	TURF	33	1
3	GORG	34	1		3	PEY	34	1
3	CCA	35	1		3	TURF	35	1
3	CCA	36	1		3	CCA	36	1
3	CCA	37	1		3	DICT	37	1
3	CCA	38	1		3	TURF	38	1
3	CCA	39	1		3	CCA	39	1
3	CCA	40	1		3	PEY	40	1
3	TAS	41	1		3	TURF	41	1
3	TAS	42	1		3	PEY	42	1
3	TAS	43	1		3	PEY	43	1
3	DICT	44	1		3	CCA	44	1
3	DICT	45	1		3	CCA	45	1
3	DICT	46	1		3	CCA	46	1
3	MCOM	47	1		3	PEY	47	1
3	HALI	48	1		3	DICT	48	1
3	PAST	49	1		3	FAN	49	1
3	DICT	50	1		3	CCA	50	1
3	DICT	51	1		3	DICT	51	1
3	CCA	52	1		3	CCA	52	1
3	DICT	53	1		3	DICT	53	1
3	DICT	54	1		3	DC	54	1
3	DICT	55	1		3	DC	55	1
3	DICT	56	1		3	TURF	56	1
3	HALI	57	1		3	CCA	57	1
3	DICT	58	1		3	CCA	58	1
3	DICT	59	1		3	CCA	59	1
3	DICT	60	1		3	HALI	60	1
3	DICT	61	1		3	DICT	61	1
3	DICT	62	1		3	DICT	62	1
3	CCA	63	1		3	DICT	63	1
3	TAS	64	1		3	TURF	64	1
3	TAS	65	1		3	HALI	65	1
3	TAS	66	1		3	HALI	66	1
3	CCA	67	1		3	HALI	67	1
3	CCA	68	1		3	CCA	68	1
3	CCA	69	1		3	HALI	69	1
3	CCA	70	1		3	HALI	70	1
3	GORG	71	1		3	PAST	71	1
3	GORG	72	1		3	CCA	72	1
3	CCA	73	1		3	CCA	73	1
3	DICT	74	1		3	HALI	74	1
3	DICT	75	1		3	PAST	75	1
3	DICT	76	1		3	PAST	76	1
3	CCA	77	1		3	DICT	77	1
3	CCA	78	1		3	FAN	78	1
3	DICT	79	1		3	DICT	79	1
3	CCA	80	1		3	DICT	80	1
3	TAS	81	1		3	TURF	81	1
3	TAS	82	1		3	TURF	82	1
3	TAS	83	1		3	TURF	83	1
3	TAS	84	1		3	HALI	84	1
3	TAS	85	1		3	DICT	85	1
3	TAS	86	1		3	CCA	86	1
3	HALI	87	1		3	CCA	87	1
3	DICT	88	1		3	TURF	88	1
3	CCA	89	1		3	CCA	89	1
3	DICT	90	1		3	DICT	90	1
3	TAS	91	1		3	TURF	91	1
3	TAS	92	1		3	TURF	92	1
3	TAS	93	1		3	CCA	93	1
3	TAS	94	1		3	TURF	94	1
3	TAS	95	1		3	DICT	95	1
3	CCA	96	1		3	DICT	96	1
3	FMA	97	1		3	PEY	97	1
3	DICT	98	1		3	CCA	98	1
3	DICT	99	1		3	PEY	99	1
3	DICT	100	1		3	AAGA	100	1

## Sheet: F1 spawning information
SPECIE	Acropora palmata
Cohort	2011	2012
Colonies outplanted in Picudas Reef, Puerto Morelos, Quintana Roo. México
Spawning date: Aug 14th 2022.
The small amount of gametes released by the spawning colonies and the current conditions at Picudas Reef did not allow the collection of a larger amount of gametes from these colonies.
Specie	Cohort	ID Colony	Collection	Gamete volume (ml)	Length (cm)	Width (cm)	Height (cm)	Number of branches	Colony condition
APAL	2011	120	no	~50 boundles	25	20	30	3	Healthy
APAL	2012	324	yes	2	22	17	15	4	Healthy
APAL	2012	441	yes	2	40	35	45	7	Healthy
APAL	2012	125	yes	0.1	16	18	23	5	Healthy

## Sheet: F2 Settlement and size
SPECIES	Acropora palmata
Cohort	2022
Parens: Colonies outplanted in Picudas Reef from 2011 and 2012 cohorts, Puerto Morelos, Quintana Roo. México
Monitoring of the settlement of the larvae obtained was done visually. It was evident that several larvae settled on the bottom and walls of the hatcheryincubator and these were not considered in the monitoring.
SN= not available
Substrate type H: concrete tetrapod, J-gear type: gear concreate and resin									Survival monitoring of substrates was made randomly at 3 months of age									A subset of 19 settlers were randomly selected, monitoring under microscope using a mini scale and photographs were taked at 3 months of age
																		Photographs were analized withe ImageJ sofware to obtain length, width and area measures.
Settlement									Survival
Especie	Substrate ID	Substrate type	Monitoring date	Settler age (days)	# settlers				Especie	Subtrate ID	Substrate type	Monitoring date	Settler age (months)	# recruits				Especie	Monitoring date	Settler age (months)	# Recruit	Length (mm)	Width (mm)	area (mm2)
Apal	sn	H	2022-08-29	15	3				Apal	1	H	2022-11-15	3	0				Apal	2022-11-15	3	1	1.509	1.487	153.762
Apal	sn	H	2022-08-29	15	5				Apal	2	H	2022-11-15	3	0				Apal	2022-11-15	3	2	1.035	0.796	170.338
Apal	sn	H	2022-08-29	15	5				Apal	3	H	2022-11-15	3	0				Apal	2022-11-15	3	3	0.985	1.132	173.817
Apal	sn	H	2022-08-29	15	6				Apal	4	H	2022-11-15	3	0				Apal	2022-11-15	3	4	1.46	1.432	145.399
Apal	sn	H	2022-08-29	15	7				Apal	5	H	2022-11-15	3	0				Apal	2022-11-15	3	5	1.478	1.381	159.231
Apal	sn	H	2022-08-29	15	4				Apal	6	H	2022-11-15	3	0				Apal	2022-11-15	3	6	1.356	1.232	171.752
Apal	sn	H	2022-08-29	15	3				Apal	7	H	2022-11-15	3	0				Apal	2022-11-15	3	7	0.815	0.709	142.456
Apal	sn	H	2022-08-29	15	2				Apal	8	J gears	2022-11-15	3	1				Apal	2022-11-15	3	8	1.246	1.038	153.138
Apal	sn	H	2022-08-29	15	1				Apal	9	J gears	2022-11-15	3	1				Apal	2022-11-15	3	9	1.361	1.058	126.389
Apal	sn	H	2022-08-29	15	2				Apal	10	J gears	2022-11-15	3	1				Apal	2022-11-15	3	10	1.087	0.744	131.695
Apal	sn	H	2022-08-29	15	2				Apal	11	J gears	2022-11-15	3	1				Apal	2022-11-15	3	11	1.608	1.425	140.438
Apal	sn	H	2022-08-29	15	2				Apal	12	J gears	2022-11-15	3	1				Apal	2022-11-15	3	12	1.219	1.126	151.793
Apal	sn	H	2022-08-29	15	7				Apal	13	J gears	2022-11-15	3	1				Apal	2022-11-15	3	13	0.57	0.555	127
Apal	sn	H	2022-08-29	15	5				Apal	14	J gears	2022-11-15	3	1				Apal	2022-11-15	3	14	1.091	1.02	128.194
Apal	sn	H	2022-08-29	15	3				Apal	15	J gears	2022-11-15	3	1				Apal	2022-11-15	3	15	1.032	0.81	142.362
Apal	sn	H	2022-08-29	15	0				Apal	16	J gears	2022-11-15	3	1				Apal	2022-11-15	3	16	1.016	0.753	134.945
Apal	sn	H	2022-08-29	15	0				Apal	17	J gears	2022-11-15	3	1				Apal	2022-11-15	3	17	1.195	1.084	177.95
Apal	sn	H	2022-08-29	15	0				Apal	18	J gears	2022-11-15	3	1				Apal	2022-11-15	3	18	0.982	0.92	184.017
Apal	sn	H	2022-08-29	15	0				Apal	19	J gears	2022-11-15	3	1				Apal	2022-11-15	3	19	1.105	1.055	122.132
Apal	sn	J-gear	2022-08-29	15	3				Apal	20	J gears	2022-11-15	3	1
Apal	sn	J-gear	2022-08-29	15	4				Apal	21	J gears	2022-11-15	3	1
Apal	sn	J-gear	2022-08-29	15	3				Apal	22	J gears	2022-11-15	3	1
Apal	sn	J-gear	2022-08-29	15	3				Apal	23	J gears	2022-11-15	3	1
Apal	sn	J-gear	2022-08-29	15	1				Apal	24	J gears	2022-11-15	3	1
Apal	sn	J-gear	2022-08-29	15	2				Apal	25	J gears	2022-11-15	3	1
Apal	sn	J-gear	2022-08-29	15	1				Apal	26	J gears	2022-11-15	3	2
Apal	sn	J-gear	2022-08-29	15	5				Apal	27	J gears	2022-11-15	3	2
Apal	sn	J-gear	2022-08-29	15	4				Apal	28	J gears	2022-11-15	3	2
Apal	sn	J-gear	2022-08-29	15	1				Apal	29	J gears	2022-11-15	3	2
Apal	sn	J-gear	2022-08-29	15	3				Apal	30	J gears	2022-11-15	3	2
Apal	sn	J-gear	2022-08-29	15	1				Apal	31	J gears	2022-11-15	3	2
Apal	sn	J-gear	2022-08-29	15	9				Apal	32	J gears	2022-11-15	3	2
Apal	sn	J-gear	2022-08-29	15	6				Apal	33	J gears	2022-11-15	3	2
Apal	sn	J-gear	2022-08-29	15	2				Apal	34	J gears	2022-11-15	3	2
Apal	sn	J-gear	2022-08-29	15	11				Apal	35	J gears	2022-11-15	3	2
Apal	sn	J-gear	2022-08-29	15	1				Apal	36	J gears	2022-11-15	3	2
Apal	sn	J-gear	2022-08-29	15	5				Apal	37	J gears	2022-11-15	3	2
Apal	sn	J-gear	2022-08-29	15	1				Apal	38	J gears	2022-11-15	3	2
Apal	sn	J-gear	2022-08-29	15	1				Apal	39	J gears	2022-11-15	3	2
Apal	sn	J-gear	2022-08-29	15	3				Apal	40	J gears	2022-11-15	3	2
Apal	sn	J-gear	2022-08-29	15	1				Apal	41	J gears	2022-11-15	3	3
Apal	sn	J-gear	2022-08-29	15	4				Apal	42	J gears	2022-11-15	3	3
Apal	sn	J-gear	2022-08-29	15	2				Apal	43	J gears	2022-11-15	3	3
Apal	sn	J-gear	2022-08-29	15	1				Apal	44	J gears	2022-11-15	3	4
Apal	sn	J-gear	2022-08-29	15	2				Apal	45	J gears	2022-11-15	3	4
Apal	sn	J-gear	2022-08-29	15	3				Apal	46	J gears	2022-11-15	3	5
Apal	sn	J-gear	2022-08-29	15	2				Apal	47	J gears	2022-11-15	3	5
Apal	sn	J-gear	2022-08-29	15	5				Apal	48	J gears	2022-11-15	3	6
Apal	sn	J-gear	2022-08-29	15	1				Apal	49	J gears	2022-11-15	3	13
Apal	sn	J-gear	2022-08-29	15	1				Apal	50	J gears	2022-11-15	3	16
Apal	sn	J-gear	2022-08-29	15	2				Apal	51	J gears	2022-11-15	3	22
Apal	sn	J-gear	2022-08-29	15	1				Apal	52	J gears	2022-11-15	3	0
Apal	sn	J-gear	2022-08-29	15	4				Apal	53	J gears	2022-11-15	3	0
Apal	sn	J-gear	2022-08-29	15	2				Apal	54	J gears	2022-11-15	3	0
Apal	sn	J-gear	2022-08-29	15	2
Apal	sn	J-gear	2022-08-29	15	2
Apal	sn	J-gear	2022-08-29	15	2
Apal	sn	J-gear	2022-08-29	15	2
Apal	sn	J-gear	2022-08-29	15	4
Apal	sn	J-gear	2022-08-29	15	4
Apal	sn	J-gear	2022-08-29	15	0
Apal	sn	J-gear	2022-08-29	15	0
Apal	sn	J-gear	2022-08-29	15	0
Apal	sn	J-gear	2022-08-29	15	0
Apal	sn	J-gear	2022-08-29	15	0
Apal	sn	J-gear	2022-08-29	15	0
Apal	sn	J-gear	2022-08-29	15	0
Apal	sn	J-gear	2022-08-29	15	0
Apal	sn	J-gear	2022-08-29	15	0
Apal	sn	J-gear	2022-08-29	15	0
