# Supplementary material for: Long-term survival, growth, and reproduction of Acropora palmata sexual recruits outplanted onto Mexican Caribbean reefs
Source: PeerJ. 2023 Aug 1;11:e15813. doi: 10.7717/peerj.15813 (PMC10402697; doi:10.7717/peerj.15813)
Supplement: Supplemental Information 2 [file peerj-11-15813-s002.xlsx]

## Sheet: Oocytes and spermaries
SPECIES	Acropora palmata
Cohort	2011	2012
Samples were collected in August 2019 from transplanted colonies at Cuevones Reef, Cancun, Quintana Roo. Mexico.
In the laboratory samples were processed after fixation and decalcification.
After dissection of polyps, gonads and gametes were counted under the microscope.
Sample	Polyp number	Oocytes	Spermaries
2	1	6	3
	2	6	3
	3	8	3
	4	6	3
	5	6	3
	6	6	2
	7	7	2
	8	5	2
	9	5	2
	10	5	2
	11	5	2
	12	10	2
	13	7	2
	14	7	3
3	1	5	4
	2	4	2
	3	5	3
	4	8	5
	5	7	4
	6	7	3
	7	7	2
	8	5	2
	9	0	0
	10	0	0
8	1	5	3
	2	4	3
	3	7	4
	4	3	5
	5	4	2
	6	6	3
	7	0	0
	8	0	0
	9	0	0
	10	0	0
	11	0	0
	12	0	0
	13	0	0
10	1	2	3
	2	5	3
	3	4	3
	4	0	0
	5	0	0
	6	0	0
	7	0	0
	8	0	0
	9	0	0
	10	0	0
20	1	7	4
	2	3	3
	3	6	6
	4	2	0
	5	2	1
	6	0	2
	7	5	4
	8	0	3
	9	4	4
	10	9	4
	11	6	4
	12	0	0
	13	0	0
24	1	6	3
	2	5	2
	3	6	3
	4	6	3
	5	8	3
	6	9	4
	7	6	3
	8	6	3
	9	1	2
	10	1	3
	11	8	4
	12	6	2
	13	4	5
	14	6	5
26	1	5	3
	2	4	2
	3	4	4
	4	5	2
	5	5	3
	6	5	3
	7	6	3
	8	5	3
	9	6	3
	10	4	3
	11	4	3
	12	4	0
31	1	6	4
	2	3	3
	3	3	4
	4	5	3
	5	5	2
	6	4	3
	7	5	2
	8	0	0
	9	0	0
	10	0	0
Total		387	221
Mean		4.03125	2.30208
SD		2.74323	1.5295
Max		10	6
Min		0	0

## Sheet: Gametes diameter
		Oocytes		Spermaries
Sample	Polyp	Diameter max (µm)	Diameter max (mm)	Diameter max (µm)	Diameter max (mm)
2	1	717	0.717	1619	1.619
	2	761	0.761	1270	1.27
	3	661	0.661
	4	765	0.765
	5	792	0.792
	6	652	0.652
3	1	847	0.847	1573	1.573
	2	790	0.79	1728	1.728
	3	741	0.741
	4	715	0.715
	5	915	0.915
	6	992	0.992
8	1	853	0.853	1844	1.844
	2	751	0.751	1300	1.3
	3	842	0.842
	4	743	0.743
	5	923	0.923
	6	989	0.989
10		845	0.845
		867	0.867
20	1	915	0.915	2088	2.088
	2	991	0.991	1460	1.46
	3	952	0.952
	4	892	0.892
	5	995	0.995
	6	922	0.922
24	1	692	0.692	697	0.697
	2	717	0.717	1335	1.335
	3	656	0.656
	4	590	0.59
26	1	867	0.867	1963	1.963
	2	645	0.645	1511	1.511
	3	869	0.869
	4	742	0.742
	5	695	0.695
	6	690	0.69
31	1	557	0.557	788	0.788
	2	546	0.546	2047	2.047
	3	651	0.651
	4	480	0.48
	5	555	0.555
	6	499	0.499
Total	40				14
Mean		768.548	0.768548	1515.93	1.51593
DE		141.093	0.141093	422.372	0.422372
Min.		480	0.48	697	0.697
Max.		995	0.995	2088	2.088

## Sheet: Gonadal index
	Sample	Polyps dissected	Polyps with oocytes	% Fertility per sample	Mean oocytes per sample	SD	Oocytes per sample	Polyps/cm2	Oocytes/cm2
	2	14	14	100	6.35714	1.39268	89	19.67	125.045
	3	10	8	80	4.8	2.82056	48	23.33	89.5872
	8	13	6	46	2.23077	2.68185	29	14.67	15.104
	10	10	3	30	1.1	1.91195	11	18.33	6.0489
	20	13	9	69	3.38462	3.04243	44	19.33	45.294
	24	14	14	100	5.57143	2.31099	78	19	105.857
	26	12	12	100	4.75	0.753778	57	17.33	82.3175
	31	10	7	79	3.1	2.33095	31	18.33	39.7761
	TOTAL	96	73
	MEAN								63.6287
	SD								43.3483
	Sample	Polyps dissected	Polyps with spermaries	% Fertility per sample	Mean spermaries per sample	SD	Spermaries per sample	Polyps/cm2	Spermaries/cm2
	2	14	14	100	2.42857	0.513553	34	19.67	47.77
	3	10	8	80	2.5	1.64992	25	23.33	46.66
	8	13	6	46	1.53846	1.85362	20	14.67	10.4166
	10	10	3	30	0.9	1.44914	9	18.33	4.9491
	20	13	10	77	2.69231	1.93152	35	19.33	40.0325
	24	14	14	100	3.21429	0.974961	45	19	61.0714
	26	12	11	92	2.66667	0.984732	32	17.33	42.3622
	31	10	7	70	2.1	1.59513	21	18.33	26.9451
	TOTAL	96	73
	MEAN								35.0259
	SD								19.3854
